# Supplementary material for: Racial and Ethnic Differences in Anthropometric Measures as Risk Factors for Diabetes
Source: Oxford University Press journal article supplement (doi:10.2337/dc18-1413), 2018-10-23
Supplement: dc181413supplementarydata.pdf [file dc181413supplementarydata.pdf]

SUPPLEMENTARY DATA

**Supplementary Table 1. Association (HR 95% CI) between anthropometric measures and diabetes risk by race/ethnicity after excluding the first two years of follow up \***

|                                         | <b>Overall<br/>(N=132,105)</b> | <b>Non-Hispanic<br/>White<br/>(N=112,519)</b> | <b>American<br/>Indian or Alaska<br/>Native<br/>(N=492)</b> | <b>Asian<br/>(N=3402)</b> | <b>Black or<br/>African-<br/>American<br/>(N=10,679)</b> | <b>Hispanic/La<br/>tina<br/>(N=5013)</b> | <b>P for<br/>interaction</b> |
|-----------------------------------------|--------------------------------|-----------------------------------------------|-------------------------------------------------------------|---------------------------|----------------------------------------------------------|------------------------------------------|------------------------------|
|                                         | HR (95% CI)                    | HR (95% CI)                                   | HR (95% CI)                                                 | HR (95% CI)               | HR (95% CI)                                              |                                          |                              |
| <b>BMI (kg/m<sup>2</sup>) (%)</b>       |                                |                                               |                                                             |                           |                                                          |                                          | 0.01                         |
| <25 (36.5)                              | 1                              | 1                                             | 1                                                           | 1                         | 1                                                        | 1                                        |                              |
| 25-<30 (35.2)                           | 1.63 (1.56 1.70)               | 1.60 (1.52 1.67)                              | 1.91 (0.85 4.28)                                            | 2.15 (1.72 2.70)          | 1.57 (1.33 1.85)                                         | 1.83 (1.45 2.30)                         |                              |
| ≥30 (28.3%)                             | 2.82 (2.70 2.95)               | 2.83 (2.70 2.97)                              | 4.17 (1.86 9.36)                                            | 3.05 (2.23 4.18)          | 2.39 (2.04 2.79)                                         | 3.24 (2.57 4.07)                         |                              |
| In continuous **                        | 1.41 (1.40-1.43)               | 1.44 (1.42-1.46)                              | 1.48 (1.12-1.97)                                            | 1.46 (1.33-1.62)          | 1.28 (1.23-1.33)                                         | 1.39 (1.30-1.47)                         | <0.0001                      |
| <b>Waist circumference<br/>(cm) (%)</b> |                                |                                               |                                                             |                           |                                                          |                                          | 0.001                        |
| <78 (30.5)                              | 1                              | 1                                             | 1                                                           | 1                         | 1                                                        | 1                                        |                              |
| 78-88 (32.1)                            | 1.56 (1.49 1.64)               | 1.50 (1.42 1.58)                              | 1.46 (0.62 3.46)                                            | 2.51 (1.96 3.20)          | 1.67 (1.39 1.99)                                         | 1.74 (1.37 2.21)                         |                              |
| >88 (37.4)                              | 2.99 (2.86 3.13)               | 2.93 (2.79 3.08)                              | 2.41 (1.10 5.25)                                            | 4.05 (3.06 5.36)          | 2.78 (2.35 3.29)                                         | 3.60 (2.87 4.52)                         |                              |
| In continuous **                        | 1.50 (1.48 1.52)               | 1.51 (1.49-1.53)                              | 1.44 (1.12-1.83)                                            | 1.80 (1.63-1.99)          | 1.38 (1.33-1.44)                                         | 1.54 (1.45-1.64)                         | <0.0001                      |
| <b>Waist to hip ratio (%)</b>           |                                |                                               |                                                             |                           |                                                          |                                          | 0.003                        |
| <0.78 (37.2)                            | 1                              | 1                                             | 1                                                           | 1                         | 1                                                        | 1                                        |                              |
| 0.78-0.85 (37.1)                        | 1.60 (1.53 1.67)               | 1.58 (1.51 1.65)                              | 1.96 (0.86 4.46)                                            | 2.02 (1.49 2.76)          | 1.65 (1.46 1.86)                                         | 1.54 (1.26 1.89)                         |                              |
| >0.85 (25.7)                            | 2.72 (2.61 2.84)               | 2.72 (2.59 2.84)                              | 2.77 (1.25 6.14)                                            | 4.41 (3.22 6.03)          | 2.38 (2.10 2.70)                                         | 3.07 (2.51 3.76)                         | <0.0001                      |
| In continuous **                        | 1.20 (1.20 1.21)               | 1.20 (1.19-1.21)                              | 1.28 (1.06-1.54)                                            | 1.17 (1.13-1.22)          | 1.24 (1.20-1.28)                                         | 1.23 (1.19-1.27)                         | 0.22                         |

\* In the multivariable-adjusted models, we adjusted for age at enrollment (in continuous), race/ethnicity (for overall model only), education (high school or less, some college/technical training, college or some post-college, and master or higher), family history of diabetes (no, yes), different study cohorts (participation in OS or CTs), smoking (never, former, current), alcohol intake (non-drinker, past drinker, current and <7 drinks/wk, current and ≥7

## SUPPLEMENTARY DATA

drinks/wk), physical activity (<5, 5-<10, 10-<20, 20-<30, 30+ Metabolic equivalent (METs)/week), Healthy eating index (HEI)-2005 score, high cholesterol requiring medicine (no, yes), different treatment assignments for all three CTs, and weight gain during the first two years.

\*\* When anthropometric measures were analyzed as continuous variables, the corresponding hazard ratio presents increased risk of diabetes per one increased standard deviation.

**Supplementary Table 2. Correlations between anthropometric measures and body composition biomarkers \***

|                                          |     | Whole body fat | Whole body fat percent | Trunk fat | Trunk to leg fat ratio |
|------------------------------------------|-----|----------------|------------------------|-----------|------------------------|
| <b>Overall</b>                           | BMI | 0.90           | 0.75                   | 0.87      | 0.31                   |
|                                          | WC  | 0.84           | 0.69                   | 0.88      | 0.49                   |
|                                          | WHR | 0.29           | 0.25                   | 0.41      | 0.56                   |
| <b>Non-Hispanic White</b>                | BMI | 0.90           | 0.76                   | 0.87      | 0.35                   |
|                                          | WC  | 0.84           | 0.70                   | 0.88      | 0.53                   |
|                                          | WHR | 0.33           | 0.28                   | 0.44      | 0.57                   |
| <b>American Indian or Alaskan Native</b> | BMI | 0.86           | 0.72                   | 0.81      | 0.21                   |
|                                          | WC  | 0.80           | 0.72                   | 0.87      | 0.49                   |
|                                          | WHR | 0.20           | 0.24                   | 0.40      | 0.65                   |
|                                          |     |                |                        |           |                        |
| <b>Asian</b>                             | BMI | 0.94           | 0.83                   | 0.91      | 0.11                   |
|                                          | WC  | 0.76           | 0.66                   | 0.80      | 0.32                   |
|                                          | WHR | 0.01 (NS)      | 0.03 (NS)              | 0.15 (NS) | 0.55                   |
|                                          |     |                |                        |           |                        |
| <b>Black or African-American</b>         | BMI | 0.93           | 0.77                   | 0.89      | 0.18                   |
|                                          | WC  | 0.81           | 0.64                   | 0.85      | 0.39                   |
|                                          | WHR | 0.07           | 0.001 (NS)             | 0.20      | 0.45                   |
|                                          |     |                |                        |           |                        |
| <b>Hispanic/Latina</b>                   | BMI | 0.85           | 0.68                   | 0.83      | 0.26                   |
|                                          | WC  | 0.86           | 0.71                   | 0.89      | 0.44                   |
|                                          | WHR | 0.25           | 0.24                   | 0.37      | 0.58                   |

\* All corrections were significant except those marked with NS (not significant). BMI: body mass index, WC: waist circumference, and WHR: waist-to-hip ratio.

## SUPPLEMENTARY DATA

### SHORT LIST OF WHI INVESTIGATORS

**Program Office:** (National Heart, Lung, and Blood Institute, Bethesda, Maryland) Jacques Rossouw, Shari Ludlam, Joan McGowan, Leslie Ford, and Nancy Geller

**Clinical Coordinating Center:** (Fred Hutchinson Cancer Research Center, Seattle, WA) Garnet Anderson, Ross Prentice, Andrea LaCroix, and Charles Kooperberg

**Investigators and Academic Centers:** (Brigham and Women's Hospital, Harvard Medical School, Boston, MA) JoAnn E. Manson; (MedStar Health Research Institute/Howard University, Washington, DC) Barbara V. Howard; (Stanford Prevention Research Center, Stanford, CA) Marcia L. Stefanick; (The Ohio State University, Columbus, OH) Rebecca Jackson; (University of Arizona, Tucson/Phoenix, AZ) Cynthia A. Thomson; (University at Buffalo, Buffalo, NY) Jean Wactawski-Wende; (University of Florida, Gainesville/Jacksonville, FL) Marian Limacher; (University of Iowa, Iowa City/Davenport, IA) Jennifer Robinson; (University of Pittsburgh, Pittsburgh, PA) Lewis Kuller; (Wake Forest University School of Medicine, Winston-Salem, NC) Sally Shumaker; (University of Nevada, Reno, NV) Robert Brunner; (University of Minnesota, Minneapolis, MN) Karen L. Margolis

**Women's Health Initiative Memory Study:** (Wake Forest University School of Medicine, Winston-Salem, NC) Mark Espeland

*For a list of all the investigators who have contributed to WHI science, please visit:*  
<https://www.whi.org/researchers/Documents%20Write%20a%20Paper/WHI%20Investigator%20Long%20List.pdf>
